# Supplementary material for: Carotenoid metabolism strengthens the link between feather coloration and individual quality
Source: PubMed Central journal article supplement (PMC5758789; doi:10.1038/s41467-017-02649-z), 2018-01-08
Supplement: 41467_2017_2649_MOESM3_ESM.pdf [file 41467_2017_2649_MOESM3_ESM.pdf]

**File Name:** Supplementary Data 1

**Description:** Data used in code to perform meta-analyses.

**File Name:** Supplementary Data 2

**Description:** References for studies included in the meta-analyses.

**File Name:** Supplementary Data 3

**Description:** R code used to perform meta-analyses.
